# Supplementary material
Source: HighWire-hosted journal article supplement (https://bmjpaedsopen.bmj.com/content/3/1/e000479)
Supplement: inline-supplementary-material-1 [file inline-supplementary-material-1.pdf]

Office ID:

**Better Start Bradford Project Satisfaction Questionnaire**

Thank you for completing this questionnaire. We really appreciate your feedback about the [NAME OF PROJECT]. Please note your answers will not affect the support you will receive now or in the future.

Please tick the box which best describes your answer to each question.

1. Overall, I feel that the [NAME OF PROJECT] was helpful for [me/my family/my child]

|                                                                                                        |                                                                                               |                                                                                                                 |                                                                                              |                                                                                                       |
|--------------------------------------------------------------------------------------------------------|-----------------------------------------------------------------------------------------------|-----------------------------------------------------------------------------------------------------------------|----------------------------------------------------------------------------------------------|-------------------------------------------------------------------------------------------------------|
| <br>Strongly disagree | <br>Disagree | <br>Neither agree nor disagree | <br>Agree | <br>Strongly agree |
|                                                                                                        |                                                                                               |                                                                                                                 |                                                                                              |                                                                                                       |

2. I am satisfied with the level of support [I/my family/child] received

|                                                                                                          |                                                                                                 |                                                                                                                   |                                                                                                |                                                                                                         |
|----------------------------------------------------------------------------------------------------------|-------------------------------------------------------------------------------------------------|-------------------------------------------------------------------------------------------------------------------|------------------------------------------------------------------------------------------------|---------------------------------------------------------------------------------------------------------|
| <br>Strongly disagree | <br>Disagree | <br>Neither agree nor disagree | <br>Agree | <br>Strongly agree |
|                                                                                                          |                                                                                                 |                                                                                                                   |                                                                                                |                                                                                                         |

3. The information given was useful to [me/my family/my child]

|                                                                                                          |                                                                                                 |                                                                                                                   |                                                                                                |                                                                                                         |
|----------------------------------------------------------------------------------------------------------|-------------------------------------------------------------------------------------------------|-------------------------------------------------------------------------------------------------------------------|------------------------------------------------------------------------------------------------|---------------------------------------------------------------------------------------------------------|
| <br>Strongly disagree | <br>Disagree | <br>Neither agree nor disagree | <br>Agree | <br>Strongly agree |
|                                                                                                          |                                                                                                 |                                                                                                                   |                                                                                                |                                                                                                         |

4. It was easy for me to get onto the [NAME OF PROJECT]

| <br>Strongly disagree | <br>Disagree | <br>Neither agree nor disagree | <br>Agree | <br>Strongly agree |
|--------------------------------------------------------------------------------------------------------|-----------------------------------------------------------------------------------------------|-----------------------------------------------------------------------------------------------------------------|----------------------------------------------------------------------------------------------|-------------------------------------------------------------------------------------------------------|
|                                                                                                        |                                                                                               |                                                                                                                 |                                                                                              |                                                                                                       |

5. I would recommend the [NAME OF PROJECT] to my friends and family

| <br>Strongly disagree | <br>Disagree | <br>Neither agree nor disagree | <br>Agree | <br>Strongly agree |
|--------------------------------------------------------------------------------------------------------|-----------------------------------------------------------------------------------------------|-----------------------------------------------------------------------------------------------------------------|----------------------------------------------------------------------------------------------|-------------------------------------------------------------------------------------------------------|
|                                                                                                        |                                                                                               |                                                                                                                 |                                                                                              |                                                                                                       |

6. Overall, I am happy with the [NAME OF PROJECT]?

| <br>Strongly disagree | <br>Disagree | <br>Neither agree nor disagree | <br>Agree | <br>Strongly agree |
|----------------------------------------------------------------------------------------------------------|-------------------------------------------------------------------------------------------------|-------------------------------------------------------------------------------------------------------------------|------------------------------------------------------------------------------------------------|---------------------------------------------------------------------------------------------------------|
|                                                                                                          |                                                                                                 |                                                                                                                   |                                                                                                |                                                                                                         |

Thank you for completing this questionnaire. Please place your questionnaire in the envelope provided. If you have any further comments about [NAME OF PROJECT] please write them in the box below.
